# Supplementary material
Source: PubMed Central journal article supplement (PMC2966835)
Supplement: Supp_Data.pdf [file Supp_Data.pdf]

## APPENDIX. IEZZONI CONDITIONS

*Iezzoni conditions and ICD-9 codes for cancers*

---

| ICD-9 Code | Description                                                        |
|------------|--------------------------------------------------------------------|
| 150.0      | Malignant neoplasm of cervical esophagus                           |
| 150.1      | Malignant neoplasm of thoracic esophagus                           |
| 150.2      | Malignant neoplasm of abdominal esophagus                          |
| 150.3      | Malignant neoplasm of upper third of esophagus                     |
| 150.4      | Malignant neoplasm of middle third of esophagus                    |
| 150.5      | Malignant neoplasm of lower third of esophagus                     |
| 150.8      | Malignant neoplasm of other specified part                         |
| 150.9      | Malignant neoplasm of esophagus, unspecified                       |
| 151.0      | Malignant neoplasm of cardia                                       |
| 151.1      | Malignant neoplasm of pylorus                                      |
| 151.2      | Malignant neoplasm of pyloric antrum                               |
| 151.3      | Malignant neoplasm of fundus of stomach                            |
| 151.4      | Malignant neoplasm of body of stomach                              |
| 151.5      | Malignant neoplasm of lesser curvature, unspecified                |
| 151.6      | Malignant neoplasm of greater curvature, unspecified               |
| 151.8      | Malignant neoplasm of other specified sites of stomach             |
| 151.9      | Malignant neoplasm of stomach, unspecified                         |
| 155.0      | Malignant neoplasm of liver, primary                               |
| 155.1      | Malignant neoplasm of intrahepatic bile ducts                      |
| 155.2      | Malignant neoplasm of liver, not specified as primary or secondary |
| 157.0      | Malignant neoplasm of head of pancreas                             |
| 157.1      | Malignant neoplasm of body of pancreas                             |
| 157.2      | Malignant neoplasm of tail of pancreas                             |
| 157.3      | Malignant neoplasm of pancreatic duct                              |
| 157.4      | Malignant neoplasm of islets of Langerhans                         |
| 157.8      | Malignant neoplasm of other specified sites of pancreas            |
| 157.9      | Malignant neoplasm of pancreas, part unspecified                   |
| 158.0      | Malignant neoplasm of retroperitoneum                              |
| 158.8      | Malignant neoplasm of specified parts of peritoneum                |
| 158.9      | Malignant neoplasm of peritoneum, unspecified                      |
| 162.0      | Malignant neoplasm of trachea                                      |
| 162.2      | Malignant neoplasm of main bronchus                                |
| 162.3      | Malignant neoplasm of upper lobe, bronchus or lung                 |
| 162.4      | Malignant neoplasm of middle lobe, bronchus or lung                |
| 162.5      | Malignant neoplasm of lower lobe, bronchus or lung                 |
| 162.8      | Malignant neoplasm of other parts of bronchus or lung              |
| 162.9      | Malignant neoplasm of bronchus and lung, unspecified               |
| 163.0      | Malignant neoplasm of parietal pleura                              |
| 163.1      | Malignant neoplasm of visceral pleura                              |
| 163.8      | Malignant neoplasm of other specified sites of pleura              |
| 163.9      | Malignant neoplasm of pleura, unspecified                          |
| 183.0      | Malignant neoplasm of ovary                                        |
| 183.2      | Malignant neoplasm of fallopian tube                               |

*(continued)*

*Iezzoni conditions and ICD-9 codes for cancers*

| ICD-9 Code | Description                                                                         |
|------------|-------------------------------------------------------------------------------------|
| 183.3      | Malignant neoplasm of broad ligament                                                |
| 183.4      | Malignant neoplasm of parametrium                                                   |
| 183.5      | Malignant neoplasm of round ligament                                                |
| 183.8      | Malignant neoplasm of other specified sites of uterine adnexa                       |
| 183.9      | Malignant neoplasm of uterine adnexa, unspecified                                   |
| 191.0      | Malignant neoplasm of cerebrum, except lobes and ventricles                         |
| 191.1      | Malignant neoplasm of frontal lobe                                                  |
| 191.2      | Malignant neoplasm of temporal lobe                                                 |
| 191.3      | Malignant neoplasm of parietal lobe                                                 |
| 191.4      | Malignant neoplasm of occipital lobe                                                |
| 191.5      | Malignant neoplasm of ventricles                                                    |
| 191.6      | Malignant neoplasm of cerebellum not otherwise specified                            |
| 191.7      | Malignant neoplasm of brain stem                                                    |
| 191.8      | Malignant neoplasm of other parts of brain                                          |
| 191.9      | Malignant neoplasm of brain, unspecified                                            |
| 204.00     | Acute lymphoid leukemia without mention of remission                                |
| 204.10     | Chronic lymphoid leukemia without mention of remission                              |
| 204.20     | Subacute lymphoid leukemia without mention of remission                             |
| 204.80     | Other lymphoid leukemia without mention of remission                                |
| 204.90     | Unspecified lymphoid leukemia without mention of remission                          |
| 205.0      | Acute myeloid leukemia without mention of remission                                 |
| 205.10     | Chronic myeloid leukemia without mention of remission                               |
| 205.20     | Subacute myeloid leukemia without mention of remission                              |
| 205.30     | Myeloid sarcoma without mention of remission                                        |
| 205.80     | Other myeloid leukemia without mention of remission                                 |
| 205.90     | Unspecified myeloid leukemia without mention of remission                           |
| 206.00     | Acute monocytic leukemia without mention of remission                               |
| 206.10     | Chronic monocytic leukemia without mention of remission                             |
| 206.20     | Subacute monocytic leukemia without mention of remission                            |
| 206.80     | Other monocytic leukemia without mention of remission                               |
| 206.90     | Unspecified monocytic leukemia without mention of remission                         |
| 207.00     | Acute erythremia and erythroleukemia without mention of remission                   |
| 207.10     | Chronic erythremia without mention of remission                                     |
| 207.20     | Megakaryocytic leukemia without mention of remission                                |
| 207.80     | Other specified leukemia without mention of remission                               |
| 208.00     | Acute leukemia of unspecified cell type without mention of remission                |
| 208.10     | Chronic leukemia of unspecified cell type without mention of remission              |
| 208.20     | Subacute leukemia of unspecified cell type without mention of remission             |
| 208.80     | Other leukemia of unspecified cell type without mention of remission                |
| 208.90     | Unspecified leukemia without mention of remission                                   |
| 196.0      | Secondary and unspecified malignant neoplasm of lymph nodes of head, face, and neck |
| 196.1      | Secondary and unspecified malignant neoplasm of intrathoracic lymph nodes           |
| 196.2      | Secondary and unspecified malignant neoplasm of intra-abdominal lymph nodes         |

## APPENDIX. IEZZONI CONDITIONS (CONT'D.)

*Iezzoni conditions and ICD-9 codes for cancers*

| ICD-9 Code | Description                                                                                   |
|------------|-----------------------------------------------------------------------------------------------|
| 196.3      | Secondary and unspecified malignant neoplasm of lymph nodes of axilla and upper limb          |
| 196.5      | Secondary and unspecified malignant neoplasm of lymph nodes of inguinal region and lower limb |
| 196.6      | Secondary and unspecified malignant neoplasm of intrapelvic lymph nodes                       |
| 196.8      | Secondary and unspecified malignant neoplasm of lymph nodes of multiple sites                 |
| 196.9      | Secondary and unspecified malignant neoplasm of lymph nodes, site unspecified                 |
| 197.0      | Secondary malignant neoplasm of lung                                                          |
| 197.1      | Secondary malignant neoplasm of mediastinum                                                   |
| 197.2      | Secondary malignant neoplasm of pleura                                                        |
| 197.3      | Secondary malignant neoplasm of other respiratory organs                                      |
| 197.4      | Secondary malignant neoplasm of small intestine, including duodenum                           |
| 197.5      | Secondary malignant neoplasm of large intestine and rectum                                    |
| 197.6      | Secondary malignant neoplasm of retroperitoneum and peritoneum                                |
| 197.7      | Secondary malignant neoplasm of liver, specified as secondary                                 |
| 197.8      | Secondary malignant neoplasm of other digestive organs and spleen                             |
| 198.0      | Secondary malignant neoplasm of kidney                                                        |
| 198.1      | Secondary malignant neoplasm of other urinary organs                                          |
| 198.2      | Secondary malignant neoplasm of skin                                                          |
| 198.3      | Secondary malignant neoplasm of brain and spinal cord                                         |
| 198.4      | Secondary malignant neoplasm of other parts of nervous system                                 |
| 198.5      | Secondary malignant neoplasm of bone and bone marrow                                          |
| 198.6      | Secondary malignant neoplasm of ovary                                                         |
| 198.7      | Secondary malignant neoplasm of adrenal gland                                                 |
| 198.81     | Secondary malignant neoplasm of breast                                                        |
| 198.82     | Secondary malignant neoplasm of genital organs                                                |
| 198.89     | Secondary malignant neoplasm of other                                                         |
| 199.0      | Malignant neoplasm without specification of site: disseminated                                |
| 199.1      | Malignant neoplasm without specification of site: other                                       |

Adapted from Iezzoni, LI, Heeren, T, Foley, S., Daley, J, Hughes, J, Coffman, GA: Chronic conditions and risk of in-hospital death. Health Services Research 1994; 29(4):435-460.
